# Supplementary material for: Preparation, characterization and application of succinimidinium hydrogensulfate ([H-Suc]HSO4) as an efficient ionic liquid catalyst for the N-Boc protection of amines
Source: Royal Society of Chemistry journal article supplement (doi:10.1039/c4ra14130j), 2015-01-01
Supplement: c4ra14130j1.pdf [file c4ra14130j1.pdf]

## Supporting Information

### **Preparation, characterization and application of succinimidinium hydrogensulfate ([H-Suc]HSO<sub>4</sub>) as an efficient ionic liquid catalyst for the *N*-Boc protection of amines**

**Farhad Shirini\*, Omid Goli Jolodar, Mohadeseh Seddighi, Hojatollah Takbiri Borujeni**

Department of Chemistry, Faculty of Sciences, University of Guilan, Rasht, zip code: 41335,

Post Box: 1914, I. R. Iran. Tel./Fax: +98 131 3233262, E-mail address: [shirini@guilan.ac.ir](mailto:shirini@guilan.ac.ir)

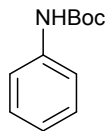

White solid, Mp: 132-133°C. IR (KBr)  $\nu$ : 1689  $\text{cm}^{-1}$ .  $^1\text{H}$  NMR (300 MHz,  $\text{CDCl}_3$ )  $\delta$ : 1.51(s, 9H), 6.55 (bs, 1H), 6.99-7.04 (m, 1H), 7.24-7.36(m, 4H);  $^{13}\text{C}$  NMR ( $\text{CDCl}_3$ , 75 MHz)  $\delta$ : 28.3, 80.4, 118.5, 122.9, 128.9, 138.3, 152.7.

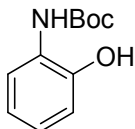

White solid, m.p. 141-143 °C dec.;  $^1\text{H}$  NMR (400 MHz,  $\text{CDCl}_3$ )  $\delta$  = 1.53 (s, 9H, Boc), 6.71 (br s, 1H, NH), 6.85 (t  $J$ = 8.0 Hz, 1H, Ar CH), 6.96 (d  $J$ =8.0 Hz, 1H, Ar CH), 7.03 (t  $J$ = 8.0 Hz, 1H, Ar CH), 7.10 (d  $J$ =8.0 Hz, 1H, Ar CH);  $^{13}\text{C}$  NMR (100 MHz,  $\text{CDCl}_3$ )  $\delta$  = 28.3, 82.1, 118.9, 120.7, 121.4, 125.6, 147.4, 155.0.

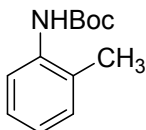

White Solid, yield 92 %; IR (KBr) :1693  $\text{cm}^{-1}$ ;  $^1\text{H}$  NMR ( $\text{CDCl}_3$ , 300 MHz)  $\delta$ : 1.52 (s,9H), 2.23 (s,3 H), 6.26 (bs, 1H), 6.95-7.06 (m, 1H), 7.11-7.20 (m, 2H), 7.78 (d,  $J$ =7.5 Hz, 1H).

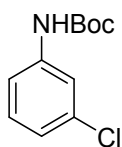

Mp: 69-70°C IR (KBr): 3368, 3306, 2987, 2938, 1695, 1592, 1519, 1400, 1268, 1237, 1178  $\text{cm}^{-1}$ .  $^1\text{H}$  NMR (300 MHz,  $\text{CDCl}_3$ ):  $\delta$  = 1.51 (s, 9H), 6.53 (br s, 1H), 7.0 (d, 1H,  $J$  = 6.75 Hz), 7.13-7.21 (m, 2H), 7.52 (s, 1H).  $^{13}\text{C}$  NMR ( $\text{CDCl}_3$ , 75 MHz)  $\delta$  = 28.29, 81.02, 116.37, 118.48, 123.02, 129.91, 134.72, 139.54, 152.43.

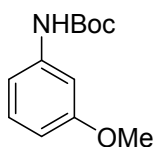

Brown solid, m.p. 54-56 °C; IR (KBr):  $\nu$  3320, 2990, 2920, 1690, 1600, 1530, 1450, 1420, 1362, 1285, 1240, 1160, 1045, 1032, 960, 870, 842  $\text{cm}^{-1}$ ;  $^1\text{H}$  NMR (DMSO, 300 MHz):  $\delta$  1.46 (s, 9H), 3.69 (s, 3H), 6.52 (d,  $J$ =7.6 Hz, 1H), 6.99 (d,  $J$ =7.6 Hz, 1H), 7.14 (d,  $J$ =7.6 Hz, 2H), 9.31 (s, 1H);  $^{13}\text{C}$  NMR (DMSO, 75 MHz):  $\delta$  28.5, 55.3, 79.4, 104.3, 107.8, 110.8, 129.8, 141.2, 153.1, 160.0.

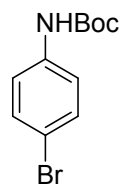

White solid, Mp: 102 °C. IR (KBr)  $\nu$ : 1690  $\text{cm}^{-1}$ .  $^1\text{H}$  NMR ( $\text{CDCl}_3$ , 300 MHz)  $\delta$ : 1.51 (s, 9H), 6.50 (bs, 1H), 7.25 (d,  $J$ = 7.53 Hz, 2H), 7.38 (d,  $J$  = 7.10 Hz, 2H).

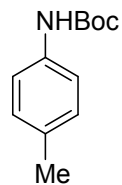

White solid, m.p. 86-87°C;  $^1\text{H}$  NMR (400 MHz,  $\text{CDCl}_3$ )  $\delta$  1.52 (s, 9H, Boc), 2.30 (s, 3H, Me), 6.57 (br s, 1H, NH), 7.09 (d,  $J$  = 7.6 Hz, 1H, Ar CH), 7.25 (d  $J$ =7.6 Hz, 2H, Ar CH);  $^{13}\text{C}$  NMR (100 MHz,  $\text{CDCl}_3$ )  $\delta$  20.7, 28.4, 80.2, 118.7, 129.4, 132.5, 135.8, 153.0.

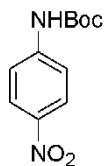

IR (neat):  $\nu$  3380, 2990, 2965, 1718, 1588, 1522, 1492, 1461, 1365, 1305, 1281, 1220, 1106, 840  $\text{cm}^{-1}$ ;  $^1\text{H}$  NMR (90 MHz,  $\text{CDCl}_3$ ):  $\delta$  1.5 (s, 9H), 4.5 (bs, 1H), 6.7 (d, 2H), 8.1 (d, 2H);  $^{13}\text{C}$  NMR (22.5 MHz,  $\text{CDCl}_3$ ):  $\delta$  29.1 (CH3), 51.5 (C), 113.0 (CH), 125.3 (CH), 126.3 (C), 137.6 (C), 152.7 (CO).

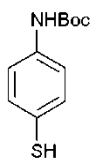

Off-white solid, Mp: 179-180° C. IR (KBr)  $\nu$  1704  $\text{cm}^{-1}$ .  $^1\text{H}$  NMR (300 MHz;  $\text{CDCl}_3$ )  $\delta$ : 1.51 (s, 9H), 4.25 (bs, 1H) 4.65 (bs, 1H), 7.19 - 7.49 (m, 4 H).

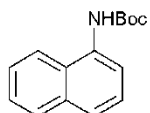

White solid, m.p. 98-99 °C;  $^1\text{H}$  NMR (400 MHz,  $\text{CDCl}_3$ )  $\delta$  1.57 (s, 9H, Boc), 6.89 (br s, 1H, NH), 7.42-7.55 (m, 3H, Ar CH), 7.63 (d  $J$ = 8.4 Hz, 1H, Ar CH), 7.80-7.95 (m, 3H, Ar CH);  $^{13}\text{C}$  NMR (100 MHz,  $\text{CDCl}_3$ )  $\delta$  28.4, 80.7, 118.7, 120.5, 124.5, 125.8, 126.0, 126.5, 128.7, 132.9, 134.0, 153.5.

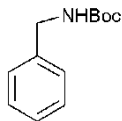

White solid, m.p. 55-57 °C; <sup>1</sup>H NMR (400 MHz, CDCl<sub>3</sub>) δ 1.46 (s, 9H, Boc), 4.30 (s, 2H, PhCH<sub>2</sub>), 4.94 (br s, 1H, NH), 7.20-7.40 (m, 5H, Ar CH); <sup>13</sup>C NMR (100 MHz, CDCl<sub>3</sub>) δ 28.4, 44.7, 79.5, 127.3, 127.4, 128.6, 138.9, 155.9.

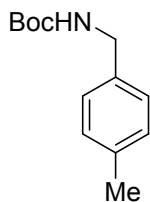

Off-white solid; m.p. 72-73 °C; IR (KBr): ν = 3,395, 2,980, 2,920, 1,680, 1,600, 1,508, 1,360, 1,320, 1,295, 1,260, 1,172, 1,000, 858, 761, 694 cm<sup>-1</sup>; <sup>1</sup>H NMR (CDCl<sub>3</sub>, 400 MHz): δ = 1.50 (s, 9H), 2.36 (s, 3H), 4.30 (d, J = 5.2, 2H), 4.88 (br s, 1H), 7.16 (d, J = 7.6 Hz, 2H), 7.20 (d, J = 8.0 Hz, 2H) ppm; <sup>13</sup>C NMR (CDCl<sub>3</sub>, 100 MHz): δ = 21.1, 28.4, 44.5, 79.4, 127.5, 129.3, 135.9, 137.0, 155.9 ppm

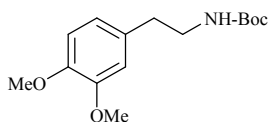

Yellow solid, m.p. 55-57 °C; IR (KBr): ν 3380, 2990, 2940, 2840, 2820, 1680, 1585, 1515, 1458, 1360, 1325, 1290, 1260, 1230, 1162, 1140, 1020, 990, 842, 808 cm<sup>-1</sup>. <sup>1</sup>H NMR (DMSO, 300 MHz) δ : 1.36 (s, 9H), 2.60 (t, J=7.0 Hz, 2H), 3.09 (t, J=7.0 Hz, 2H), 3.70 (s, 3H), 3.73 (s, 3H), 6.68 (d, J=8.25 Hz, 1H), 6.76 (s, 1H), 6.84 (d, J=8.25 Hz, 2H). <sup>13</sup>C NMR (DMSO, 75 MHz) δ : 28.69, 35.49, 42.12, 55.73, 77.89, 112.26, 112.83, 120.83, 132.29, 147.58, 149.00, 155.95.

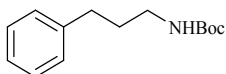

<sup>1</sup>H NMR (DMSO-d<sub>6</sub>, 400 MHz): δ = 2.3 (6H, s, CH<sub>3</sub>), 2.43 (3H, s, SCH<sub>3</sub>), 4.92 (1H, s), 7.18 (4H, s), 7.25 (2H, t, J = 7.31 Hz), 7.44 (4H, t, J = 7.82 Hz), 7.70 (4H, d, J = 7.82 Hz), 13.92 (2H, brs, OH) ppm.

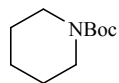

Colorless oil; IR (neat) ν; 2990, 2840, 1678, 1520, 1450, 1360, 1272, 1238, 1170, 1050, 898 cm<sup>-1</sup>. <sup>1</sup>H NMR (DMSO, 300 MHz): δ 1.36-1.57 (m, 15H), 1.44 (s, 9H), 3.29-3.34 (m, 4H); <sup>13</sup>C NMR (DMSO, 75 MHz): δ 24.3, 25.5, 28.2, 46.6, 77.6, 157.3.

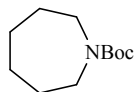

Colorless oil; IR (neat) ν; 2996, 2890, 1680, 1525, 1458, 1250 1178, 1015, 883 cm<sup>-1</sup>. <sup>1</sup>H NMR (DMSO, 300 MHz): δ 1.32-1.39 (m, 9H), 1.42-1.57 (m, 4H), 1.70-1.73 (m, 4H), 2.91-2.93 (m, 2H), 3.34 (m, 2H); <sup>13</sup>C NMR (DMSO, 75 MHz): δ 24.1, 28.2, 35.0, 52.6, 78.6, 157.4.

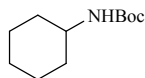

Colorless solid, mp 65-67°C, IR (CCl<sub>4</sub>) ν: 3364, 2973, 2934, 2854, 1681, 1520 1448, 1366, 1315, 1251, 1233, 1168 cm<sup>-1</sup>. <sup>1</sup>H NMR (300 MHz; CDCl<sub>3</sub>) δ : 1.04-1.15 (m, 3H), 1.26-1.34 (m, 2H), 1.44 (s, 9H), 1.57- 1.71 (m, 3H), 1.90-1.93 (m, 2H), 3.43 (bs, 1H), 4.43 (bs, 1H).

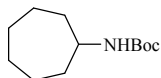

Out-white solid, m.p. 57-59 °C; IR (KBr): ν 3320, 2910, 2860, 1680, 1520, 1450, 1360, 1317, 1248, 1170, 1010, 875 cm<sup>-1</sup>; <sup>1</sup>H NMR (DMSO, 300 MHz): δ 1.32-1.39 (m, 10H), 1.42-1.57 (m, 8H), 1.70-1.73 (m, 2H), 3.34 (bs, 1H), 6.72 (d, J=7.7 Hz, 1H). <sup>13</sup>C NMR (DMSO, 75 MHz): δ 24.1, 28.2, 28.7, 35.0, 51.6, 77.6, 155.1.

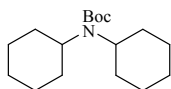

Colorless solid, mp 58 -59 °C. IR (CCl<sub>4</sub>) ν: 2929, 2854, 1686, 1436, 1365, 1295, 1177, 1159 cm<sup>-1</sup>. <sup>1</sup>H NMR (300 MHz; CDCl<sub>3</sub>) δ : 1.04-1.12 (m, 3H), 1.2-1.3 (m, 5H), 1.47-1.58 (m, 18H), 1.74-1.78 (m, 5H) <sup>13</sup>C NMR (CDCl<sub>3</sub>, 75 MHz) δ: 25.5, 26.2, 28.5, 31.2, 54.6, 78.8, 155.3.

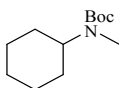

Colorless oil; IR (neat) ν; 2900, 2860, 1678, 1520, 1448, 1362, 1317, 1272 1160, 1020, 900 cm<sup>-1</sup>. <sup>1</sup>H NMR (CDCl<sub>3</sub>, 300 MHz): δ 1.06-1.21 (m, 2H), 1.36 (s, 9H), 1.58-1.71 (m, 8H), 3.10 (s, 3H), 3.50 (s, 1H); <sup>13</sup>C NMR (DMSO, 75 MHz): δ 24.9, 27.9, 28.6, 31.0, 32.4, 54.4, 77.9, 156.9.

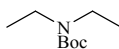

Colorless oil; IR (neat): ν = 2,900, 2,860, 1,678, 1,520, 1,448, 1,362, 1,317, 1,272 1,160, 1,020, 900 cm<sup>-1</sup>; <sup>1</sup>H NMR (CDCl<sub>3</sub>, 400 MHz): δ = 1.12 (t, J = 7.2 Hz, 6H), 1.48 (s, 9H), 3.24 (m, 4H) ppm; <sup>13</sup>C NMR (CDCl<sub>3</sub>, 100 MHz): δ = 13.84, 28.44, 41.32, 78.90, 155.34 ppm.

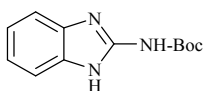

White solid; Mp 210°C; IR (neat):  $\nu$  3425, 3307, 2982, 1729, 1663, 1460, 1342, 11546, 840, 746  $\text{cm}^{-1}$ ;  $^1\text{H NMR}$  (300 MHz,  $\text{CDCl}_3$ ):  $\delta$  1.73 (s, 9H), 6.22 (br s, 1H, NH), 6.95-7.18 (d,  $J=7.81$  HZ, 2H), 7.44-7.55 (d,  $J=7.81$  HZ, 2H);  $^{13}\text{C NMR}$  (75 MHz,  $\text{CDCl}_3$ ):  $\delta$  28.1, 85.8, 113.9, 116.3, 120.6, 124.3, 130.3, 142.2, 150.7, 154.0.

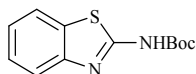

White solid; m.p. 99-101°C; IR (KBr):  $\nu$  3310, 3300, 3110, 3090, 2990, 1773, 1710, 1650, 1540, 1446, 1278, 1250, 1222, 1150, 1112, 1080, 1045  $\text{cm}^{-1}$ .  $^1\text{H NMR}$  (DMSO, 300 MHz):  $\delta$  1.63 (s, 9H), 7.31-7.52 (m, 4H), 11.7(s, 1H).  $^{13}\text{C NMR}$  (DMSO, 75 MHz):  $\delta$  28.3, 87.8, 113.4, 123.5, 125.1, 127.9, 133.8, 147.7, 161.5, 167.5.

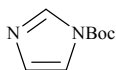

White solid, m.p. 42-45 °C; IR (KBr): 3365, 2975, 2930, 1725, 1700, 1502, 1308, 1165, 1070, 1015  $\text{cm}^{-1}$ ;  $^1\text{H NMR}$  (300MHz,  $\text{CDCl}_3$ ):  $\delta$  8.02 (s, 1H), 7.36 (s, 1H), 7.00 (s, 1H), 1.62 (s, 9H, Boc).

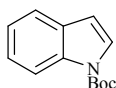

White solid; Mp 150°C; IR (neat):  $\nu$  2982, 1729, 1663, 1460, 1342, 11546, 840, 746  $\text{cm}^{-1}$ ;  $^1\text{H NMR}$  (300 MHz,  $\text{CDCl}_3$ ):  $\delta$  1.73 (s, 9H), 6.38-7.89 (m, 6H),  $^{13}\text{C NMR}$  (75 MHz,  $\text{CDCl}_3$ ):  $\delta$  28.1, 85.8, 113.9, 116.3, 120.6, 124.3, 130.3, 142.2, 150.7, 154.0

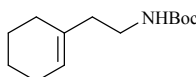

Colorless oil; IR (neat):  $\nu$  2,912, 2,858, 1,680, 1,518, 1,442, 1,366, 1,275, 1,158, 1,010, 904  $\text{cm}^{-1}$ ;  $^1\text{HNMR}$  ( $\text{CDCl}_3$ , 400 MHz)  $\delta$  1.40 (s, 9H), 1.48-1.57 (m, 4H), 1.87-1.94 (m, 4H), 2.05-2.07 (m, 2H), 3.14-3.15 (m, 2H), 4.60 (br s, 1H), 5.40 (s, 1H) ppm;  $^{13}\text{C NMR}$  ( $\text{CDCl}_3$ , 100 MHz)  $\delta$  28.4, 28.5, 31.1, 38.0, 38.2, 38.3, 78.9, 123.2, 146.7, 155.9 ppm.

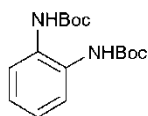

White solid, m.p. 104-106 °C;  $^1\text{H NMR}$  (400 MHz,  $\text{CDCl}_3$ )  $\delta$  1.49 (s, 18H, Boc), 6.89 (br s, 2H, NH), 7.06 (m, 2H, Ar CH), 7.43 (m, 2H, Ar CH);  $^{13}\text{C NMR}$  (100 MHz,  $\text{CDCl}_3$ )  $\delta$  28.3, 80.7, 124.1, 125.2, 130.2, 153.9.

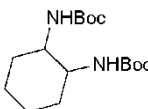

IR (KBr):  $\nu$  3380, 2920, 2850, 1680, 1517, 1450, 1360, 1245, 1178, 1050, 1004  $\text{cm}^{-1}$ .  $^1\text{H NMR}$  (DMSO, 300 MHz):  $\delta$  1.02-1.21 (m, 6H), 1.36 (s, 27H), 1.57-1.75 (m, 6H), 3.11 (s, 2H), 6.34 (d,  $J=5.89$ Hz, 1H), 6.47 (d,  $J=6.38$ Hz, 1.5H).  $^{13}\text{C NMR}$  (DMSO, 75 MHz):  $\delta$  24.9, 28.6, 32.5, 54.3, 77.9, 78.1, 155.5, 156.1.

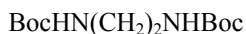

Out-white solid, m.p. 144 °C; IR (KBr,  $\text{cm}^{-1}$ ): 3379, 2985, 1685, 1164;  $^1\text{H-NMR}$  (400 MHz,  $\text{CDCl}_3$ ): 1.45 (s, 18H), 3.24 (s, 4H), 4.89 (s, NH) ppm,  $^{13}\text{C-NMR}$  (100 MHz,  $\text{CDCl}_3$ ): 28.38, 40.83, 79.45, 155.11 ppm.

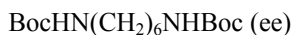

: White solid, m.p. 97 °C; IR (KBr,  $\text{cm}^{-1}$ ): 3373, 2979, 1689, 1172;  $^1\text{H-NMR}$  (400 MHz,  $\text{CDCl}_3$ ) : 1.32-1.50 (m, 26H), 3.07-3.13 (m, 4H), 4.57 (s, NH) ppm;  $^{13}\text{C-NMR}$  (100 MHz,  $\text{CDCl}_3$ ): 26.34, 28.43, 29.99, 40.38, 79.06, 156.02 ppm.

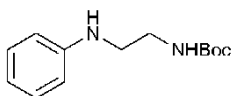

Off-White solid, m.p. 79-80 °C; IR (KBr):  $\nu$  3395, 2980, 2920, 1680, 1600, 1508, 1360, 1320, 1295, 1260, 1172, 1000, 858, 761, 694  $\text{cm}^{-1}$ ;  $^1\text{H NMR}$  (300 MHz, DMSO):  $\delta$  = 1.38 (s, 9H), 3.03- 3.09 (m, 4H), 5.56 (bs, 1H), 6.49-6.56 (m, 3H), 6.88 (bs, 1H), 7.03-7.08 (m, 2H);  $^{13}\text{C NMR}$  (75 MHz, DMSO):  $\delta$  = 28.68 (CH<sub>3</sub>), 43.18 (CH<sub>2</sub>), 78.14 (C), 112.28 (CH), 116.08 (CH), 129.38 (CH), 149.07 (C) 156.20 (C=O).

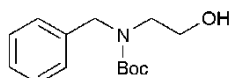

$^1\text{H NMR}$  (500 MHz,  $\text{CDCl}_3$ ):  $\delta$  = 1.51 (s, 9H), 2.18 (br s, 1H, OH), 3.44 (m, 2H), 3.74 (m, 2H), 4.50 (s, 2H), 7.27-7.32 (m, 3H), 7.37 (m, 2H);  $^{13}\text{C NMR}$  (125 MHz,  $\text{CDCl}_3$ ):  $\delta$  = 28.8 (CH<sub>3</sub>), 50.12 (CH<sub>2</sub>), 52.40 (CH<sub>2</sub>), 62.2 (CH<sub>2</sub>), 80.94 (C), 128.0 (CH), 128.9 (CH), 138.68 (CH),

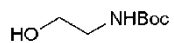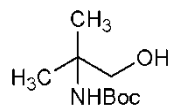

147.19 (C) 157.64 (C=O).

IR (neat):  $\nu$  3357, 2976, 2933, 1690, 1525, 1366, 1279, 1251, 1171, 1068, 864  $\text{cm}^{-1}$ ;  $^1\text{H}$  NMR (200 MHz,  $\text{CDCl}_3$ ):  $\delta$  1.44 (s, 9H), 3.25

(distorted triplet,  $J=3.77$  Hz, 2H), 3.64 (distorted triplet,  $J=3.77$  Hz, 2H), 5.16 (br s, 1H, NH);  $^{13}\text{C}$  NMR (75 MHz,  $\text{CDCl}_3$ ):  $\delta$  28.3, 43.0, 61.9, 79.5, 156.4.

Colorless solid, m.p. 50-52 °C IR (neat): 3490, 3300, 2994, 2930, 1696, 1680, 1540, 1520, 1362, 1300, 1250, 1170, 1080, 1040  $\text{cm}^{-1}$ .  $^1\text{H}$  NMR (DMSO, 300 MHz)  $\delta$  = 1.12 (s, 6H), 1.35 (s, 9H), 3.28 (s, 2H), 4.72 (bs, 1H), 6.11 (s, 1H).  $^{13}\text{C}$  NMR (DMSO, 75 MHz)  $\delta$  = 23.98, 28.72, 53.51, 68.18, 77.67, 154.86..

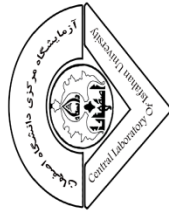

NAME EN901208-80..88  
EXPNO 20  
PROCNO 1  
Date\_ 2013.04.17  
Time 15:30  
INSTRUM spect  
PROBHD 5 mm PABBO BB-  
PULPROG zg  
TD 32768  
SOLVENT CDCl3  
NS 16  
DS 2  
SWH 8417.509 Hz  
FIDRES 0.256882 Hz  
AQ 1.9464692 sec  
RG 64  
DG 59.400 usec  
DE 6.50 usec  
TE 294.3 K  
D1 1.00000000 sec  
TD0 1

===== CHANNEL f1 =====  
NUC1 1H  
P1 11.00 usec  
PL1 -2.00 dB  
PL12 17.5167000 MHz  
PL13 17.5167000 MHz  
SFO1 400.132608 MHz  
SF 400.132608 MHz  
WDW EM  
SSB 0  
LB 0.30 Hz  
GB 0  
PC 1.00

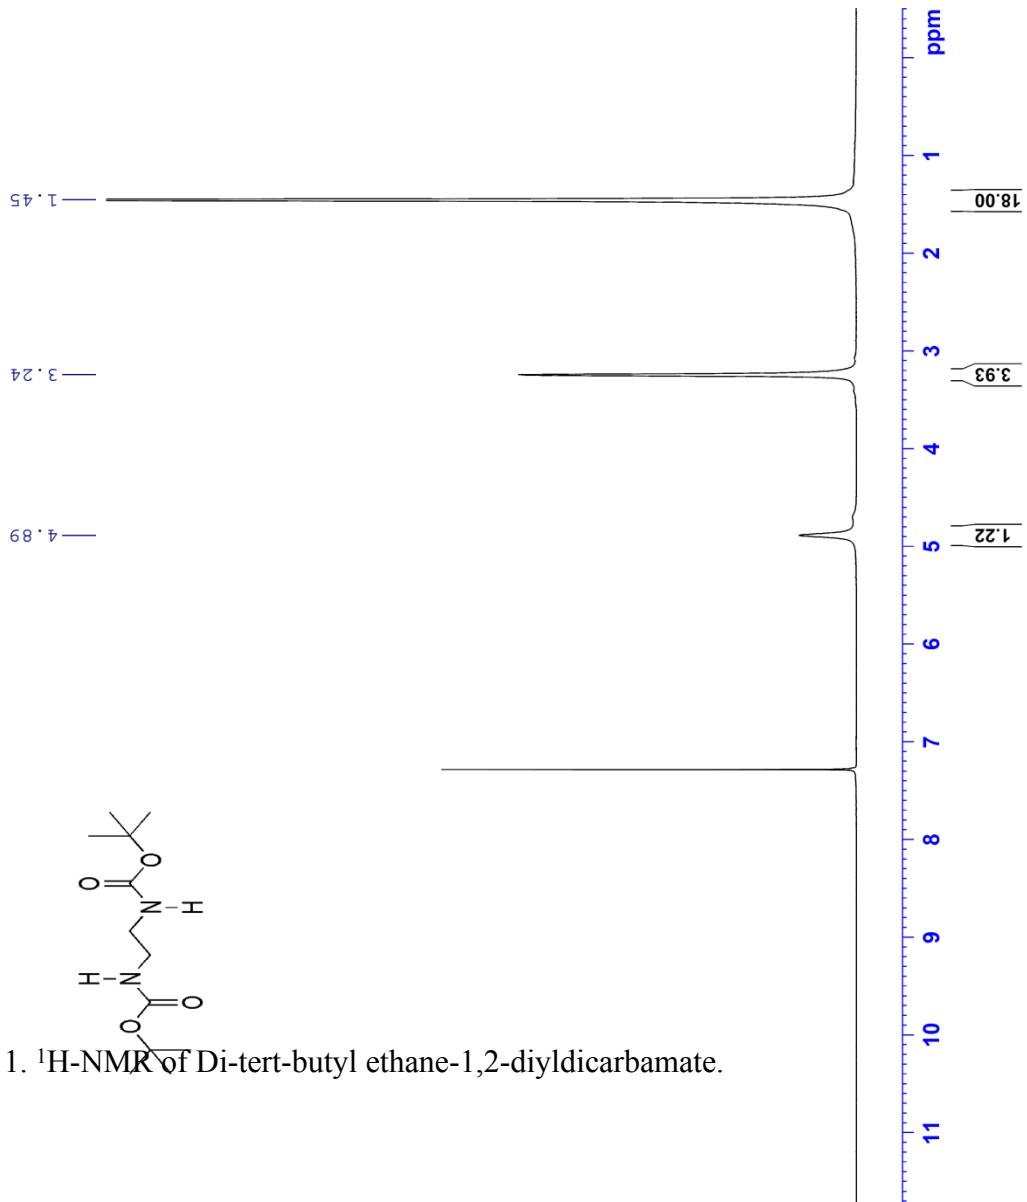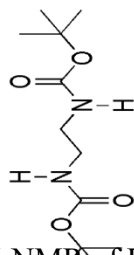

Fig. 1.  $^1\text{H-NMR}$  of Di-tert-butyl ethane-1,2-diyldicarbamate.



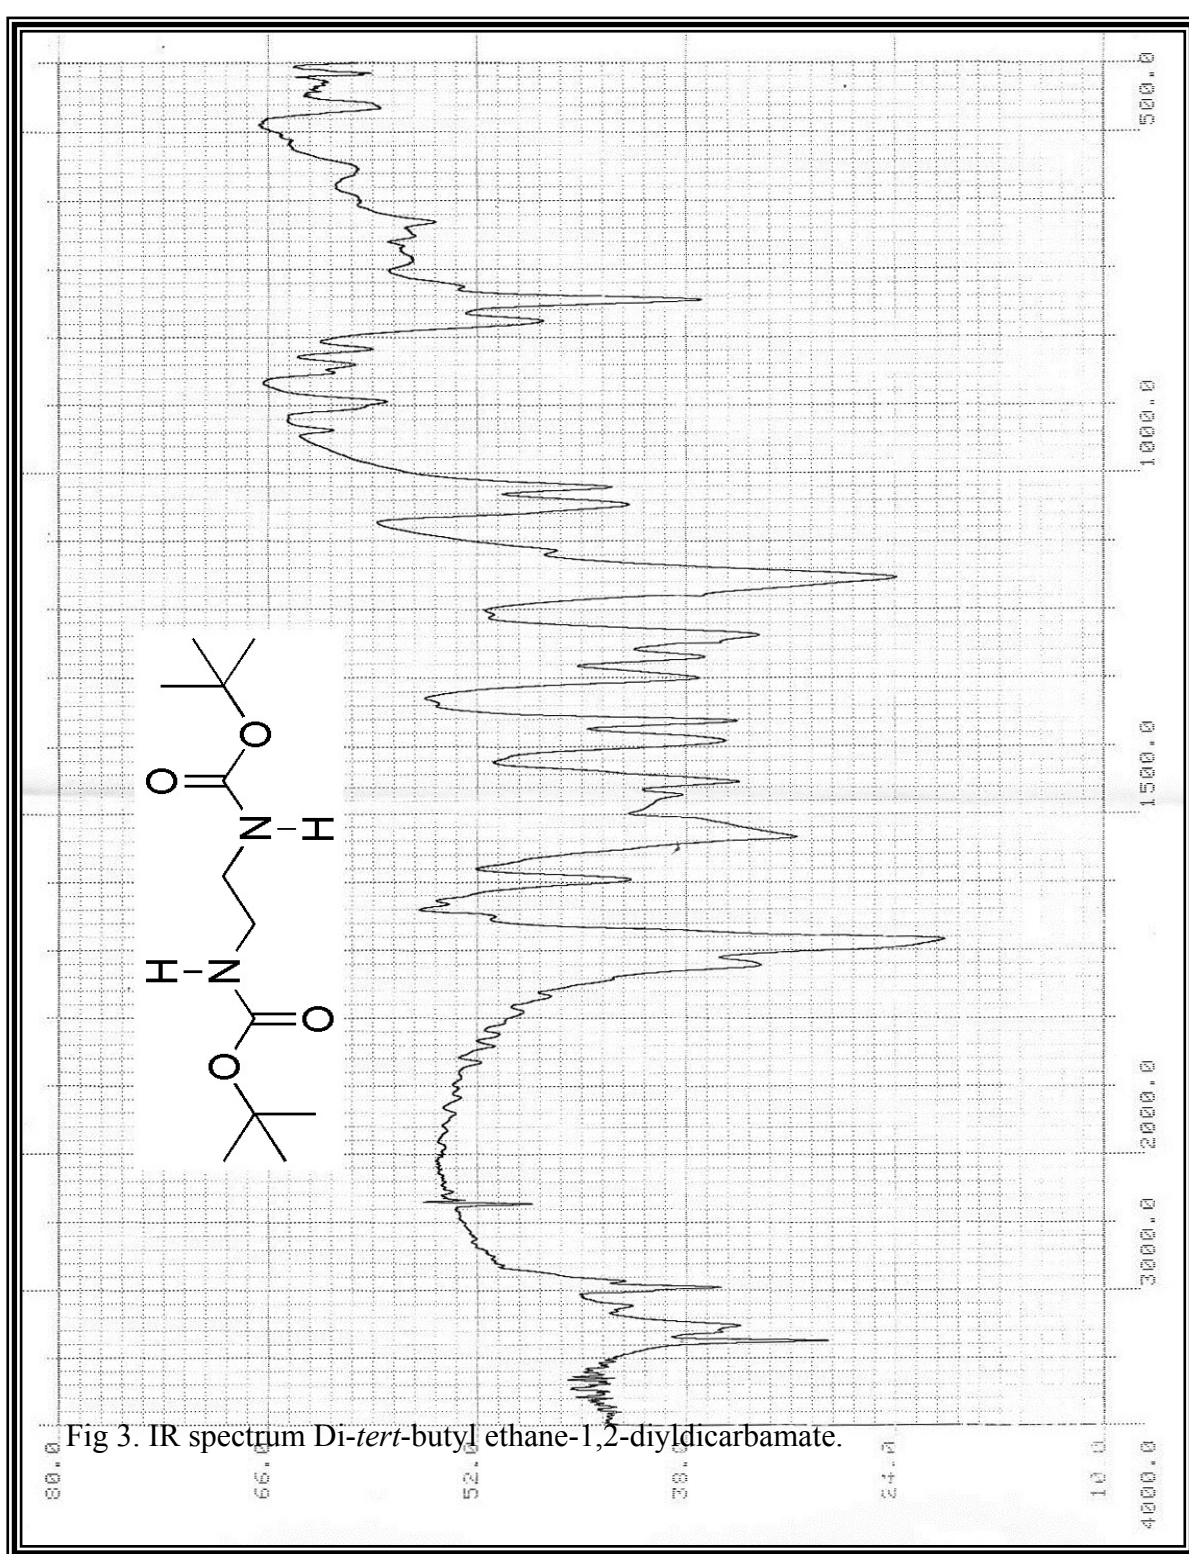



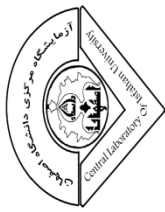

NAME: ENS901208-80-.88  
 EXPNO: 1  
 PROCNO: 1  
 Date\_: 20130416  
 Time: 15.53  
 INSTRUM: spect  
 PROBD: 5 mm FAPBO BB-  
 PULPROG: zgpg30  
 T1: 3.27  
 SOLVENT: CDCl3  
 NS: 2  
 DS: 2  
 SWH: 8417.509 Hz  
 FIDRES: 0.256882 Hz  
 AQ: 1.9464692 sec  
 RG: 64  
 DW: 59.400 usec  
 DE: 1.00 usec  
 TE: 295.2 K  
 TD: 1  
 TDO: 1.00000000 sec  
 CHANNEL F1  
 NUC1: 1H  
 P1: 11.00 usec  
 PL1: 2.00 dB  
 FLLW: 17.51671600 MHz  
 SFO1: 400.1300000 MHz  
 SF: 400.1300000 MHz  
 WDW: EM  
 SSB: 0  
 LB: 0.30 Hz  
 GB: 0  
 PC: 1.00

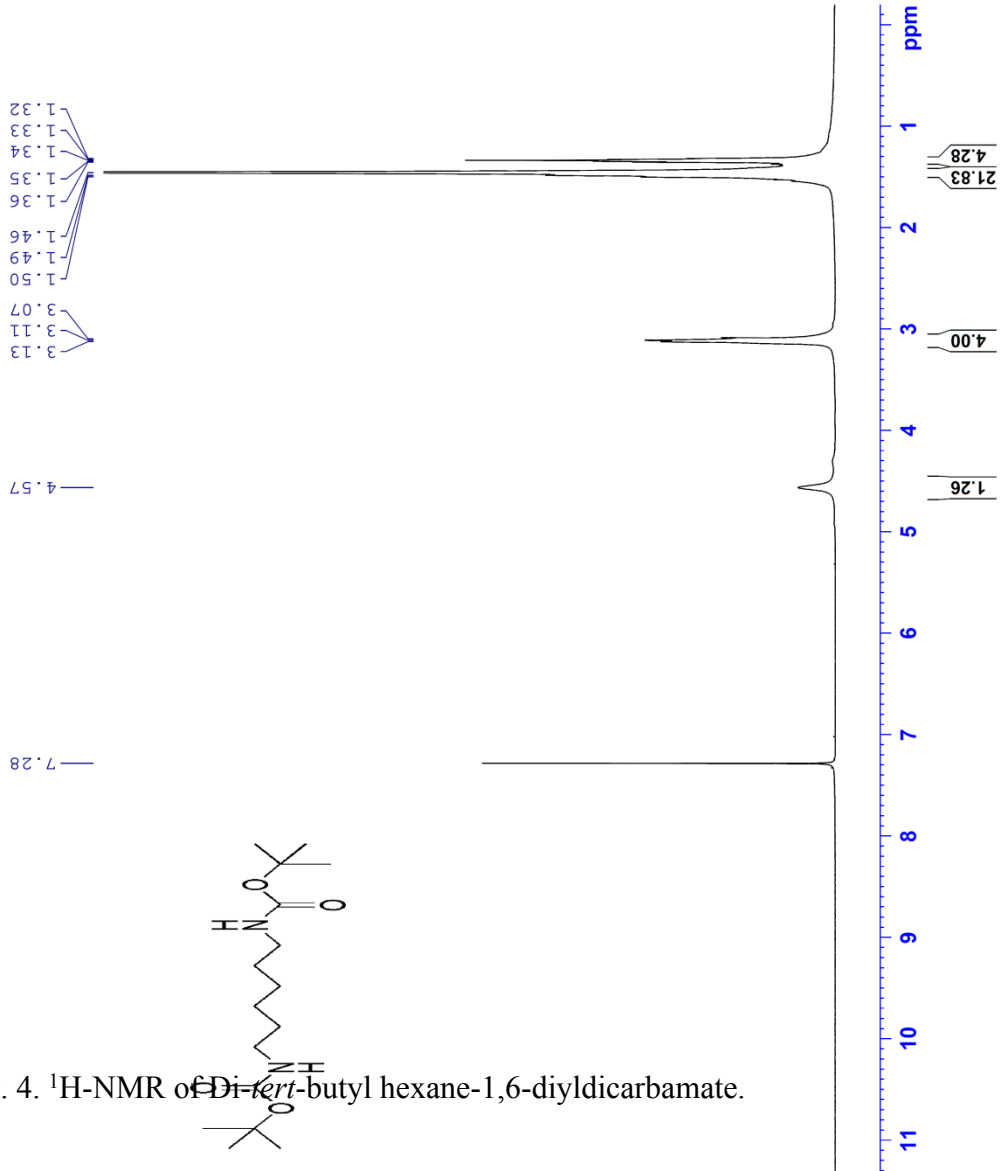

Fig. 4. <sup>1</sup>H-NMR of Di-*tert*-butyl hexane-1,6-diyl dicarbamate.

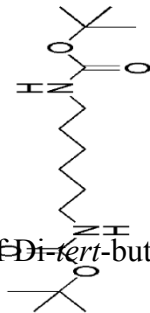

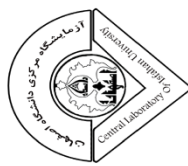

Instrument Specifications:  
 NMR Spectrometer: Bruker Avance III 400  
 Bruker, Germany

Type of experiment:  
 **$^1H$  Decoupled  $^{13}C$  Spectrum**

NAME: ENS10116-55\_58  
 EXPNO: 1  
 PROCNO: 1  
 Date\_: 20100416  
 TIME: 11.00  
 INSTRUM: spect  
 PROBHD: 5 mm PABBO BB-  
 PULPROG: zgpg30  
 TD: 32768  
 SOLVENT: CDCl3  
 NS: 1024  
 DS: 4  
 SWH: 26041.666 Hz  
 FIDRES: 0.794729 Hz  
 AQ: 0.000355 sec  
 RG: 2095  
 EC: 0.32000000  
 DW: 19.400 usec  
 DE: 6.150 usec  
 TE: 300.2 K  
 D1: 1.00000000 sec  
 D11: 0.03000000 sec  
 TDO: 1

\*\*\*\*\* CHANNEL f1 \*\*\*\*\*  
 NUCL1:  $^{13}C$   
 P1: 12.00 usec  
 PL1: -1.00 dB  
 PL1W: 42.69075012 M  
 SFO1: 100.628364 MHz  
 \*\*\*\*\* CHANNEL f2 \*\*\*\*\*  
 CDPRG2: waltz16  
 PCPD2: 80.00 usec  
 PL2: 0.00 dB  
 PL2W: 11.05230045 M  
 PL3: 18.76 dB  
 PL3W: 11.05230045 M  
 PL4: 18.76 dB  
 PL4W: 11.05230045 M  
 PL5: 18.76 dB  
 PL5W: 11.05230045 M  
 SFO2: 400.1316005 MHz  
 SI: 0  
 SSB: 0  
 GB: 0  
 PC: 1.40

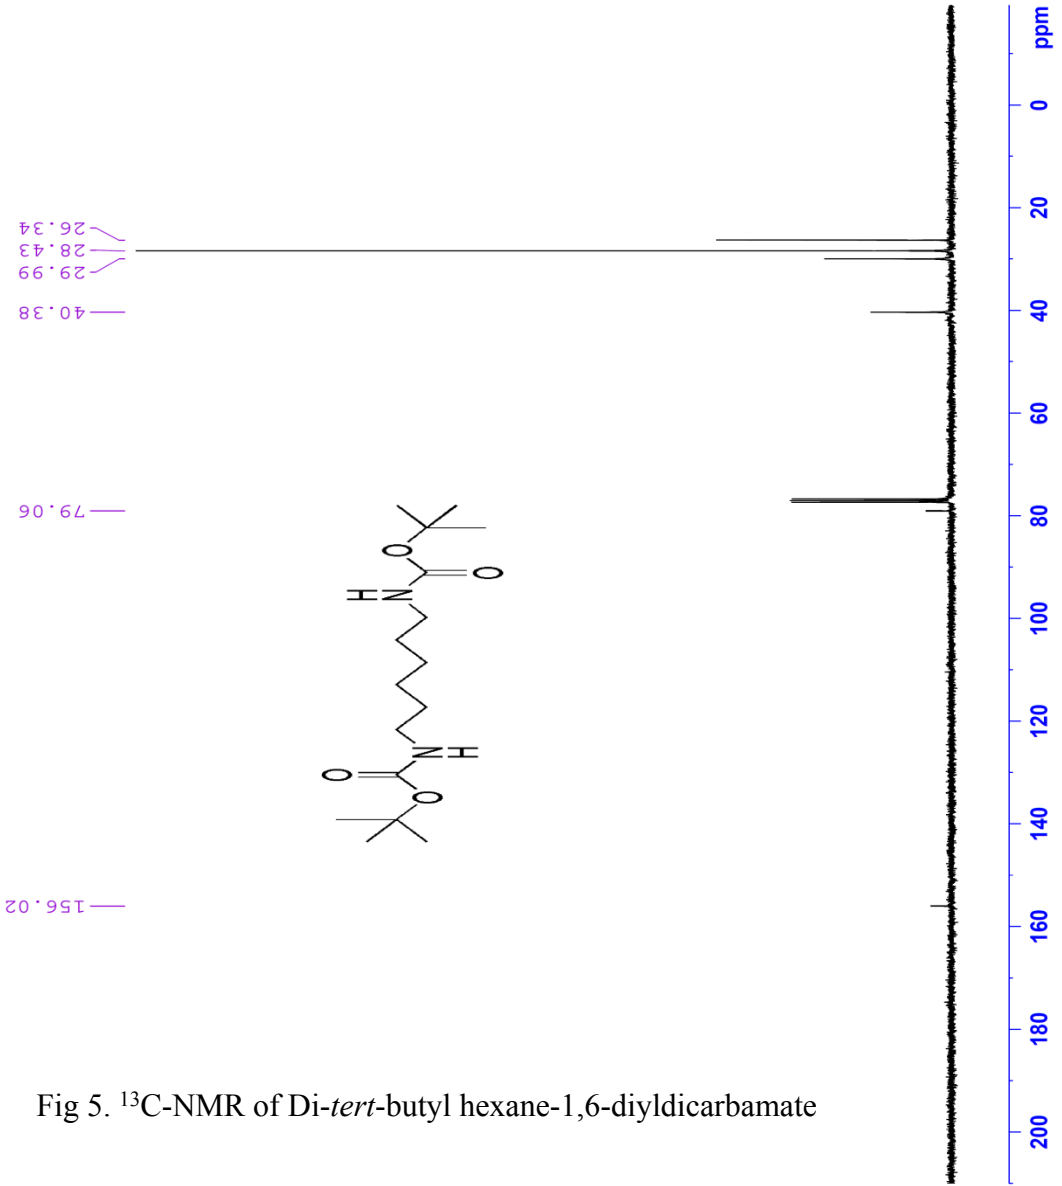

Fig 5.  $^{13}C$ -NMR of Di-*tert*-butyl hexane-1,6-diylidicarbamate

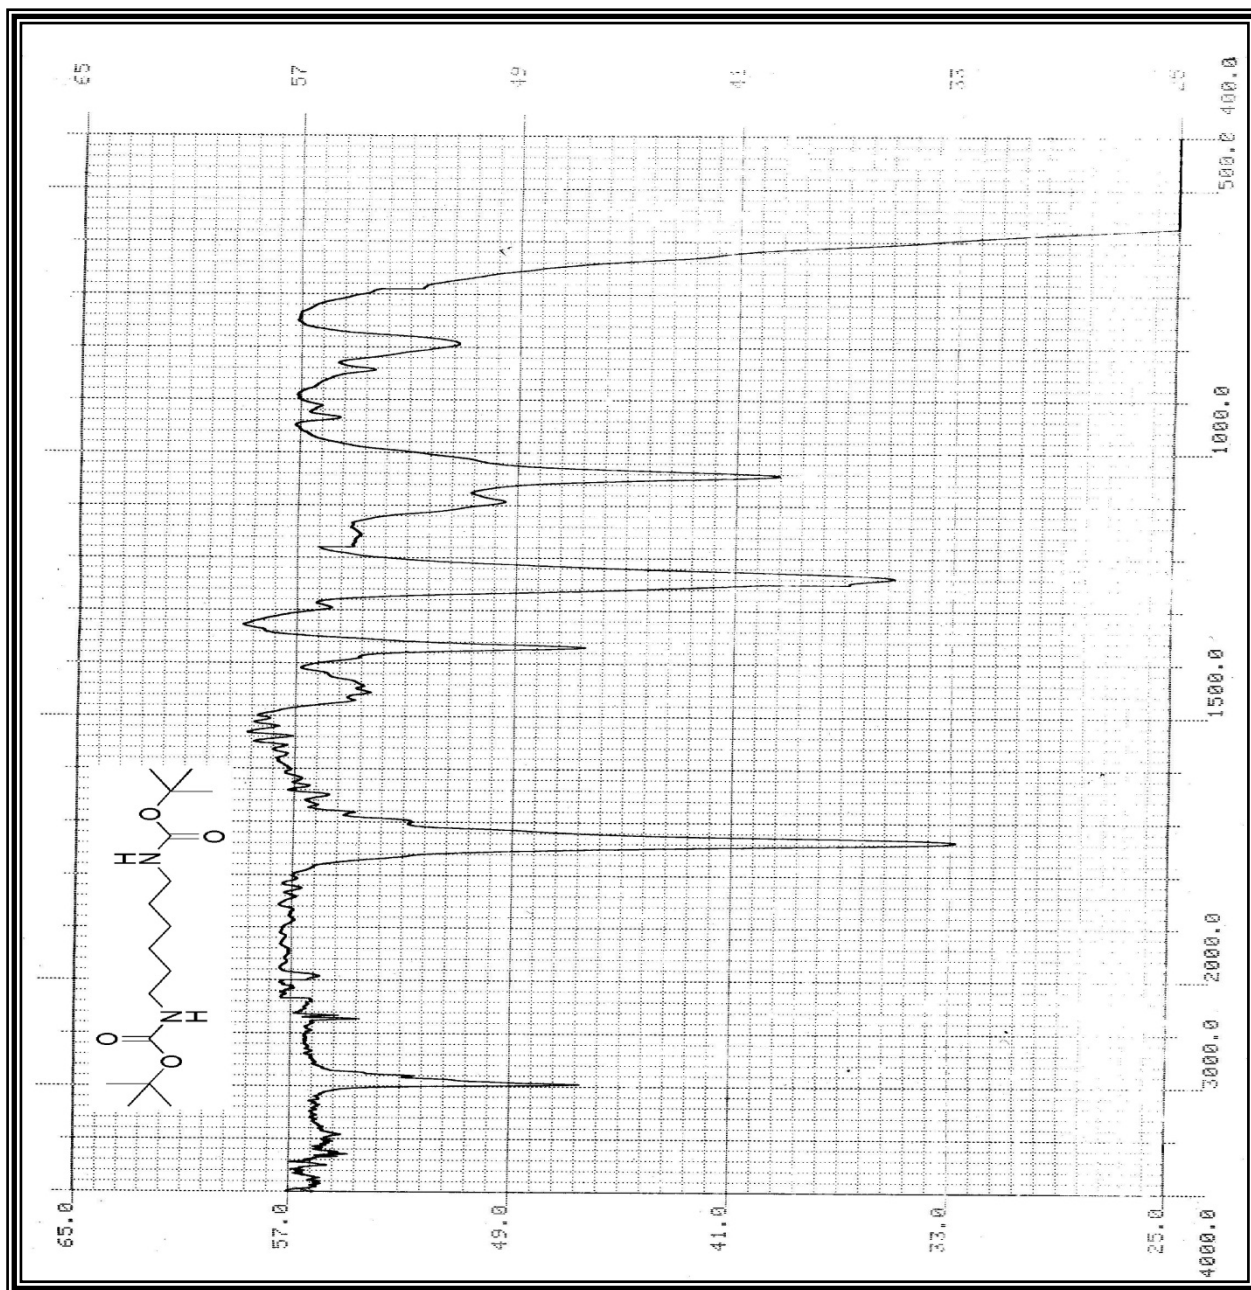

Fig. 6. IR spectrum of Di-*tert*-butyl hexane-1,6-diyl dicarbamate.

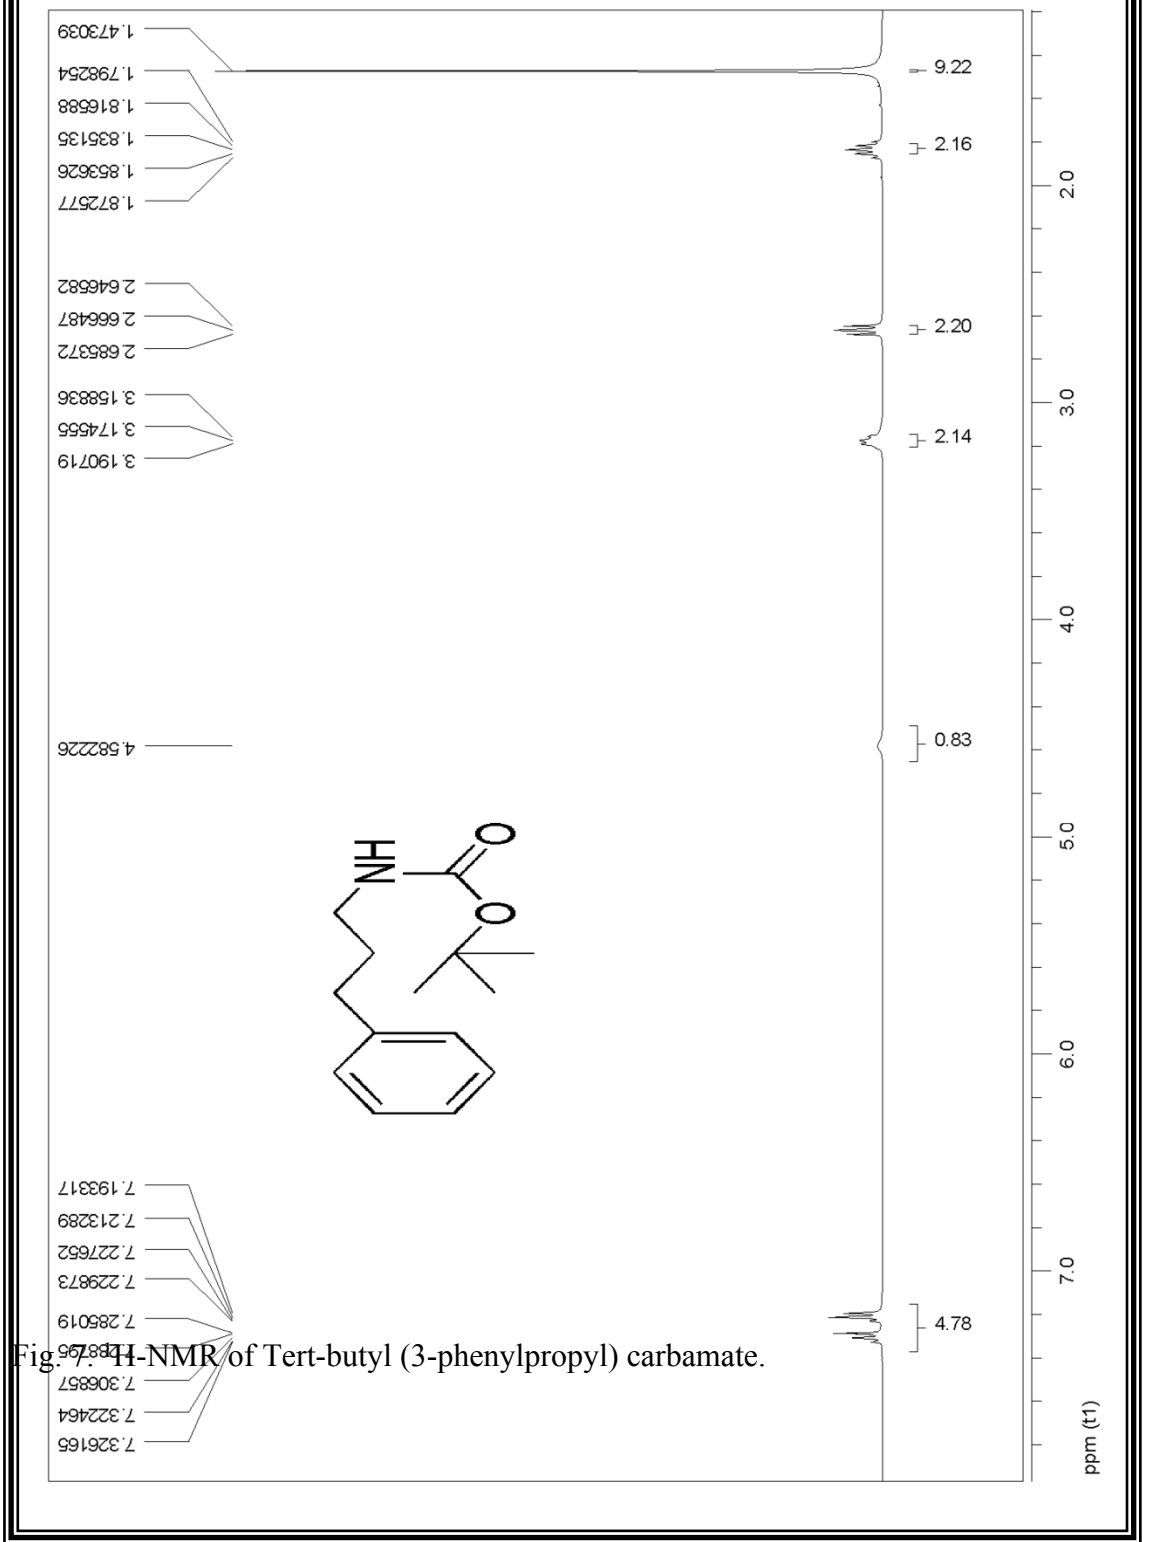

Fig. 7. 1H-NMR of Tert-butyl (3-phenylpropyl) carbamate.



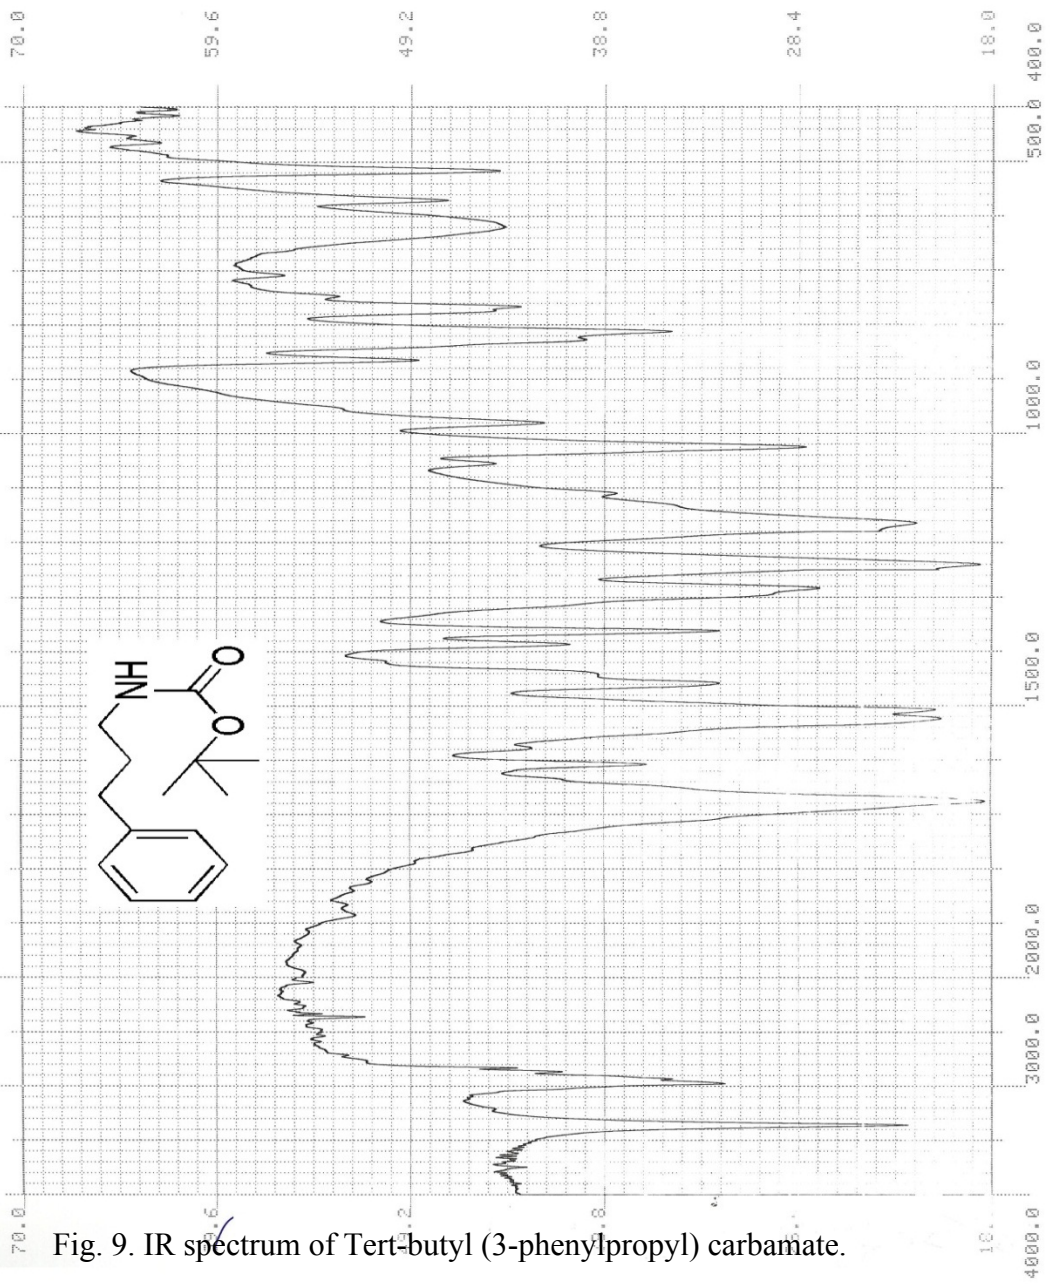

Fig. 9. IR spectrum of Tert-butyl (3-phenylpropyl) carbamate.
